# Supplementary material for: An Integrated Approach for Deciphering Hydrogeochemical Processes during Seawater Intrusion in Coastal Aquifers
Source: MDPI journal article supplement (doi:10.3390/w14071165), 2022-04-06
Supplement: s1 [file s1]

**Table S1.** Groundwater classification based on the GQISWI values. Element concentrations are in mg/L, EC is in  $\mu\text{S/cm}$ , total depth and water level are in meters.

| GW <sup>1</sup><br>Type | Class          | Sample<br>No. | Well<br>type <sup>2</sup> | Total<br>Depth | Water<br>level | pH   | TDS    | EC   | K    | Na   | Mg   | Ca   | Cl  | SO <sub>4</sub> | HCO <sub>3</sub> | Water type                                    |
|-------------------------|----------------|---------------|---------------------------|----------------|----------------|------|--------|------|------|------|------|------|-----|-----------------|------------------|-----------------------------------------------|
| Fresh Groundwater       | Highly Fresh   | 36            | D                         | 100            | 6.7            | 7.45 | 852    | 1205 | 10   | 45   | 45   | 95   | 90  | 60              | 360              | Ca-Mg-HCO <sub>3</sub> -Cl                    |
|                         |                | 38            | D                         | 110            | 6              | 7.82 | 291.9  | 440  | 9    | 20   | 18   | 36   | 33  | 15              | 168              | Ca-Mg-Na-HCO <sub>3</sub> -Cl                 |
|                         |                | 40            | D                         | 100            | 6.5            | 7.3  | 855.27 | 1310 | 12   | 64   | 38   | 115  | 100 | 49              | 426              | Ca-Mg-Na-HCO <sub>3</sub> -Cl                 |
|                         |                | 57            | D                         | 110            | 4.6            | 7.8  | 298    | 389  | 9    | 21   | 15   | 36   | 30  | 18              | 160              | Ca-Mg-Na-HCO <sub>3</sub> -Cl                 |
|                         | Slightly Fresh | 8             | D                         | 115            | 5.5            | 7.45 | 592    | 900  | 8.63 | 86.5 | 26.5 | 45   | 102 | 32              | 285              | Na-Ca-Mg-HCO <sub>3</sub> -Cl                 |
|                         |                | 9             | I                         | 50             | 5.5            | 7.58 | 283    | 399  | 5.96 | 36.2 | 13.5 | 22.5 | 60  | 15              | 122              | Na-Ca-Mg-HCO <sub>3</sub> -Cl                 |
|                         |                | 10            | HD                        | 25             | 6.5            | 7.69 | 588.6  | 888  | 8    | 92.3 | 24.8 | 42   | 100 | 30              | 253              | Na-Ca-Mg-HCO <sub>3</sub> -Cl                 |
|                         |                | 14            | I                         | 50             | 6.5            | 7.4  | 341    | 530  | 15.6 | 16.2 | 20   | 61   | 86  | 53              | 113              | Ca-Mg-Cl-HCO <sub>3</sub>                     |
|                         |                | 20            | HD                        | 35             | 4.2            | 7.42 | 645    | 1020 | 7    | 90   | 35   | 61   | 150 | 45              | 238              | Na-Ca-Mg-Cl-HCO <sub>3</sub>                  |
|                         |                | 21            | I                         | 70             | 3.3            | 8.32 | 795    | 1210 | 8    | 92   | 20   | 41   | 55  | 28              | 310              | Na-Ca-Mg-HCO <sub>3</sub> -Cl                 |
|                         |                | 23            | I                         | 50             | 5.7            | 8.61 | 313    | 482  | 7.5  | 16   | 13   | 42.5 | 80  | 17              | 113              | Ca-Mg-Cl-HCO <sub>3</sub>                     |
|                         |                | 37            | D                         | 100            | 6.5            | 7.41 | 540.9  | 820  | 18   | 45   | 33   | 50   | 71  | 93              | 219              | Mg-Ca-Na-HCO <sub>3</sub> -Cl-SO <sub>4</sub> |
|                         |                | 52            | I                         | 50             | 5              | 7.33 | 313    | 572  | 8.4  | 23.5 | 20.3 | 30.9 | 80  | 22              | 118              | Mg-Ca-Na-Cl-HCO <sub>3</sub>                  |
|                         |                | 59            | D                         | 120            | 6.5            | 7.35 | 592    | 793  | 35   | 65   | 28   | 40   | 105 | 60              | 250              | Na-Mg-Ca-HCO <sub>3</sub> -Cl                 |
|                         |                | 60            | D                         | 110            | 6.7            | 7.82 | 336    | 498  | 9    | 42   | 13   | 18   | 30  | 18              | 150              | Na-Mg-Ca-HCO <sub>3</sub> -Cl                 |

| GW <sup>1</sup><br>Type | Class          | Sample<br>No. | Well<br>type <sup>2</sup> | Total<br>Depth | Water<br>level | pH   | TDS   | EC   | K     | Na   | Mg   | Ca   | Cl  | SO <sub>4</sub> | HCO <sub>3</sub> | Water type                                    |
|-------------------------|----------------|---------------|---------------------------|----------------|----------------|------|-------|------|-------|------|------|------|-----|-----------------|------------------|-----------------------------------------------|
| Mixed Groundwater       | Slightly Mixed | 7             | I                         | 50             | 3.3            | 7.68 | 542   | 832  | 5.51  | 97   | 20   | 40   | 100 | 30              | 233              | Na-Ca-Mg-HCO <sub>3</sub> -Cl                 |
|                         |                | 11            | HD                        | 20             | 3.6            | 7.45 | 568   | 867  | 12.45 | 66.5 | 38   | 49   | 180 | 115             | 136              | Mg-Na-Ca-Cl-SO <sub>4</sub> -HCO <sub>3</sub> |
|                         |                | 15            | HD                        | 35             | 3.5            | 7.9  | 991   | 1510 | 11.5  | 83   | 46.5 | 95   | 281 | 120             | 200              | Ca-Mg-Na-Cl-HCO <sub>3</sub>                  |
|                         |                | 24            | I                         | 50             | 4              | 7.9  | 476   | 730  | 16.9  | 66   | 18   | 52.6 | 113 | 33              | 178              | Na-Ca-Mg-Cl-HCO <sub>3</sub>                  |
|                         |                | 53            | I                         | 60             | 4.75           | 8.9  | 1012  | 1686 | 28    | 120  | 80   | 70   | 250 | 132             | 289              | Mg-Na-Ca-Cl-HCO <sub>3</sub>                  |
|                         | Fairly Mixed   | 1             | HD                        | 30             | 4              | 7.33 | 2110  | 3161 | 18.3  | 250  | 130  | 222  | 950 | 350             | 140              | Ca-Na-Mg-Cl-SO <sub>4</sub>                   |
|                         |                | 6             | HD                        | 30             | 3.5            | 7.34 | 1175  | 1703 | 9.8   | 213  | 45.3 | 113  | 388 | 200             | 190              | Na-Ca-Mg-Cl-SO <sub>4</sub>                   |
|                         |                | 12            | HD                        | 20             | 3.4            | 7.56 | 1542  | 2310 | 10.5  | 258  | 64   | 122  | 510 | 250             | 285              | Na-Ca-Mg-Cl-SO <sub>4</sub>                   |
|                         |                | 19            | HD                        | 20             | 4              | 7.82 | 1050  | 1600 | 8.15  | 192  | 35   | 85   | 320 | 180             | 202              | Na-Ca-Cl-SO <sub>4</sub> -HCO <sub>3</sub>    |
|                         |                | 22            | HD                        | 20             | 5.5            | 7.3  | 1720  | 2600 | 12.3  | 286  | 110  | 132  | 586 | 200             | 366              | Na-Mg-Ca-Cl-HCO <sub>3</sub>                  |
|                         |                | 25            | I                         | 50             | 5              | 7.4  | 882   | 1290 | 4.5   | 180  | 13   | 63.5 | 190 | 36              | 300              | Na-Ca-Cl-HCO <sub>3</sub>                     |
|                         |                | 39            | D                         | 105            | 5              | 7.72 | 779.9 | 1200 | 15    | 165  | 25   | 65   | 263 | 29              | 233              | Na-Ca-Cl-HCO <sub>3</sub>                     |
|                         |                | 51            | HD                        | 35             | 3.5            | 7.4  | 702   | 1100 | 17.9  | 73   | 50   | 63   | 270 | 120             | 110              | Mg-Na-Ca-Cl-SO <sub>4</sub>                   |
|                         |                | 54            | I                         | 90             | 4.6            | 8.7  | 3120  | 5200 | 82    | 580  | 145  | 183  | 775 | 450             | 810              | Na-Mg-Cl-HCO <sub>3</sub> -SO <sub>4</sub>    |
|                         |                | 55            | I                         | 70             | 2.3            | 7.45 | 2310  | 3610 | 14    | 340  | 27.5 | 85   | 312 | 215             | 402              | Na-Ca-Cl-HCO <sub>3</sub> -SO <sub>4</sub>    |
|                         |                | 58            | D                         | 120            | 5.5            | 7.72 | 771   | 1310 | 25    | 156  | 20   | 52   | 190 | 22              | 290              | Na-Ca-Cl-HCO <sub>3</sub>                     |

| GW <sup>1</sup><br>Type | Class           | Sample<br>No. | Well<br>type <sup>2</sup> | Total<br>Depth | Water<br>level | pH   | TDS  | EC    | K     | Na    | Mg   | Ca  | Cl   | SO <sub>4</sub> | HCO <sub>3</sub> | Water type                              |
|-------------------------|-----------------|---------------|---------------------------|----------------|----------------|------|------|-------|-------|-------|------|-----|------|-----------------|------------------|-----------------------------------------|
| Mixed Groundwater       | Highly Mixed    | 2             | HD                        | 20             | 4.5            | 7.75 | 785  | 1193  | 10.1  | 200   | 25.4 | 26  | 270  | 150             | 160              | Na-Cl-SO <sub>4</sub> -HCO <sub>3</sub> |
|                         |                 | 3             | I                         | 45             | 4.5            | 7.56 | 1820 | 2736  | 13.5  | 344.5 | 55.5 | 136 | 590  | 370             | 300              | Na-Ca-Cl-SO <sub>4</sub>                |
|                         |                 | 4             | I                         | 50             | 3.5            | 7.72 | 720  | 1110  | 7.46  | 146   | 26.3 | 45  | 254  | 130             | 101              | Na-Cl-SO <sub>4</sub>                   |
|                         |                 | 17            | HD                        | 30             | 3.5            | 7.62 | 1131 | 1720  | 8.15  | 272   | 32   | 41  | 300  | 200             | 271              | Na-Cl-SO <sub>4</sub>                   |
|                         |                 | 28            | HD                        | 25             | 2.3            | 7.53 | 1508 | 2199  | 12.06 | 293   | 52   | 94  | 530  | 300             | 172              | Na-Ca-Cl-SO <sub>4</sub>                |
|                         |                 | 29            | HD                        | 20             | 2.5            | 7.4  | 2210 | 3350  | 25.3  | 410   | 85   | 140 | 900  | 360             | 160              | Na-Mg-Ca-Cl-SO <sub>4</sub>             |
|                         |                 | 32            | HD                        | 18             | 5              | 7.55 | 698  | 1060  | 8.76  | 160.4 | 20.5 | 26  | 195  | 134             | 100              | Na-Cl-SO <sub>4</sub>                   |
|                         |                 | 50            | HD                        | 45             | 4              | 7.29 | 1162 | 1793  | 15.8  | 250   | 69   | 57  | 418  | 200             | 125              | Na-Mg-Cl-SO <sub>4</sub>                |
| Mixed Groundwater       | Extremely Mixed | 5             | HD                        | 20             | 0.75           | 7.12 | 8352 | 12513 | 95    | 1670  | 350  | 460 | 3540 | 1540            | 500              | Na-Mg-Cl-SO <sub>4</sub>                |
|                         |                 | 13            | HD                        | 25             | 3.7            | 7.58 | 4033 | 6100  | 29    | 1310  | 51   | 48  | 1260 | 890             | 441              | Na-Cl-SO <sub>4</sub>                   |
|                         |                 | 16            | HD                        | 30             | 3.2            | 7.23 | 5136 | 7700  | 20    | 1130  | 198  | 290 | 2120 | 990             | 356              | Na-Cl-HCO <sub>3</sub> -SO <sub>4</sub> |
|                         |                 | 18            | HD                        | 30             | 3              | 7.65 | 1992 | 2900  | 10.1  | 493.6 | 43   | 65  | 690  | 330             | 300              | Na-Cl-SO <sub>4</sub>                   |
|                         |                 | 26            | HD                        | 20             | 2.4            | 7.84 | 2771 | 3990  | 22    | 705   | 85   | 152 | 890  | 545             | 330              | Na-Cl-SO <sub>4</sub>                   |
|                         |                 | 27            | HD                        | 20             | 1.4            | 7.78 | 3276 | 5010  | 38.97 | 613   | 100  | 136 | 990  | 700             | 175              | Na-Cl-SO <sub>4</sub>                   |
|                         |                 | 30            | I                         | 35             | 3.8            | 7.3  | 3394 | 5120  | 19.5  | 850   | 93   | 210 | 1082 | 750             | 281              | Na-Cl-SO <sub>4</sub>                   |
|                         |                 | 31            | I                         | 40             | 4              | 7.62 | 1075 | 1580  | 7.98  | 269.5 | 22   | 25  | 370  | 195             | 116              | Na-Cl-SO <sub>4</sub>                   |
|                         |                 | 44            | HD                        | 20             | 4.5            | 7.46 | 1220 | 1890  | 22.5  | 342   | 13   | 15  | 505  | 160             | 90               | Na-Cl                                   |
|                         |                 | 45            | HD                        | 20             | 5.5            | 7.16 | 1138 | 1710  | 26    | 250   | 32   | 26  | 450  | 150             | 75               | Na-Cl                                   |
|                         |                 | 46            | HD                        | 25             | 4.5            | 7.4  | 1986 | 2892  | 41.7  | 567   | 35   | 45  | 742  | 400             | 136              | Na-Cl-SO <sub>4</sub>                   |
|                         |                 | 56            | I                         | 70             | 5              | 8.3  | 2410 | 3890  | 17.5  | 660   | 55   | 90  | 581  | 518             | 450              | Na-Cl-SO <sub>4</sub> -HCO <sub>3</sub> |

| GW <sup>1</sup><br>Type | Class  | Sample<br>No. | Well<br>type <sup>2</sup> | Total<br>Depth | Water<br>level | pH   | TDS   | EC    | K    | Na    | Mg   | Ca   | Cl    | SO <sub>4</sub> | HCO <sub>3</sub> | Water type                  |
|-------------------------|--------|---------------|---------------------------|----------------|----------------|------|-------|-------|------|-------|------|------|-------|-----------------|------------------|-----------------------------|
| Saline Groundwater      | Saline | 33            | HD                        | 25             | 1.5            | 7.31 | 19550 | 30030 | 146  | 4350  | 960  | 1230 | 10120 | 2520            | 200              | Na-Mg-Cl                    |
|                         |        | 34            | HD                        | 25             | 2.2            | 7.28 | 17064 | 26000 | 55   | 3850  | 650  | 990  | 8210  | 3120            | 180              | Na-Cl-SO <sub>4</sub>       |
|                         |        | 35            | I                         | 50             | 2.5            | 7.43 | 18036 | 27100 | 28.8 | 3370  | 850  | 1200 | 7350  | 4560            | 210              | Na-Mg-Ca-Cl-SO <sub>4</sub> |
|                         |        | 41            | I                         | 50             | 1.75           | 6.9  | 15520 | 23230 | 30   | 3120  | 720  | 1554 | 9620  | 250             | 210              | Na-Ca-Mg-Cl                 |
|                         |        | 42            | HD                        | 35             | 2.75           | 7.1  | 10590 | 16020 | 30   | 2620  | 350  | 500  | 4720  | 2200            | 154              | Na-Cl-SO <sub>4</sub>       |
|                         |        | 43            | HD                        | 35             | 2.3            | 7.15 | 17290 | 25900 | 110  | 3140  | 895  | 1130 | 7150  | 4520            | 95               | Na-Mg-Cl-SO <sub>4</sub>    |
|                         |        | 47            | HD                        | 20             | 3.5            | 7.29 | 13167 | 19590 | 58.9 | 3000  | 490  | 755  | 5410  | 3000            | 72               | Na-Cl-SO <sub>4</sub>       |
|                         |        | 48            | HD                        | 40             | 3.8            | 7.1  | 15050 | 22510 | 52   | 3330  | 610  | 820  | 6310  | 3780            | 90               | Na-Mg-Cl-SO <sub>4</sub>    |
|                         |        | 49            | HD                        | 35             | 3.5            | 7.2  | 15211 | 22760 | 34.3 | 2458  | 550  | 1100 | 5100  | 3250            | 119.5            | Na-Ca-Mg-Cl-SO <sub>4</sub> |
| Seawater                |        |               |                           |                |                |      | 37900 |       | 357  | 11760 | 1515 | 426  | 20979 | 2930            | 169              |                             |

<sup>1</sup> GW: Groundwater; <sup>2</sup> D: Drinking, I: Irrigation, HD: Hand Dug

**Table S2.** The results of calculated ionic deviations (mi, react) in the groundwater samples based on the conservative mixing. f<sub>sea</sub> and saturation indices of selected minerals were also given.

| Class | Sample no. | m K react | m Na react | m Mg react | m Ca react | m Cl react | m SO <sub>4</sub> react | m HCO <sub>3</sub> react | f <sub>sea</sub> | SI <sub>cal</sub> | SI <sub>dol</sub> | SI <sub>gyps</sub> | SI <sub>hal</sub> | SMI  |
|-------|------------|-----------|------------|------------|------------|------------|-------------------------|--------------------------|------------------|-------------------|-------------------|--------------------|-------------------|------|
| FGH   | 36         | 0.00      | -0.42      | 1.06       | 1.44       | 0.00       | 0.35                    | 3.28                     | 0.29%            | 0.45              | 0.84              | -1.77              | -6.99             | 0.09 |
|       | 38         | 0.00      | -0.12      | 0.11       | 0.00       | 0.00       | -0.04                   | 0.13                     | 0.01%            | 0.16              | 0.29              | -2.6               | -7.75             | 0.03 |
|       | 40         | 0.05      | 0.16       | 0.74       | 1.94       | 0.00       | 0.22                    | 4.36                     | 0.33%            | 0.45              | 0.68              | -1.8               | -6.8              | 0.10 |
|       | 57         | 0.00      | 0.00       | 0.00       | 0.00       | 0.00       | 0.00                    | 0.00                     | 0.00%            | 0.12              | 0.13              | -2.52              | -7.76             | 0.03 |
| FGS   | 8          | -0.04     | 1.09       | 0.26       | 0.19       | 0.00       | 0.04                    | 2.05                     | 0.34%            | 0.06              | 0.16              | -2.27              | -6.64             | 0.10 |
|       | 9          | -0.09     | -0.07      | -0.15      | -0.35      | 0.00       | -0.07                   | -0.62                    | 0.14%            | -0.41             | -0.77             | -2.77              | -7.22             | 0.05 |
|       | 10         | -0.06     | 1.40       | 0.20       | 0.12       | 0.00       | 0.02                    | 1.52                     | 0.33%            | 0.22              | 0.49              | -2.32              | -6.62             | 0.11 |
|       | 14         | 0.14      | -1.57      | 0.04       | 0.60       | 0.00       | 0.28                    | -0.77                    | 0.27%            | -0.23             | -0.68             | -1.89              | -7.43             | 0.06 |
|       | 20         | -0.10     | 0.08       | 0.47       | 0.57       | 0.00       | 0.11                    | 1.28                     | 0.57%            | 0.07              | 0.17              | -2.04              | -6.46             | 0.13 |
|       | 21         | -0.04     | 2.48       | 0.13       | 0.11       | 0.00       | 0.07                    | 2.46                     | 0.12%            | 0.91              | 1.78              | -2.36              | -6.88             | 0.08 |
|       | 23         | -0.06     | -1.44      | -0.23      | 0.14       | 0.00       | -0.08                   | -0.77                    | 0.24%            | 0.81              | 1.37              | -2.48              | -7.46             | 0.05 |
|       | 37         | 0.21      | 0.04       | 0.62       | 0.33       | 0.00       | 0.72                    | 0.97                     | 0.20%            | -0.06             | -0.03             | -1.79              | -7.08             | 0.08 |
|       | 52         | -0.04     | -1.11      | 0.07       | -0.15      | 0.00       | -0.03                   | -0.69                    | 0.24%            | -0.55             | -1.01             | -2.51              | -7.29             | 0.06 |
|       | 59         | 0.63      | 0.09       | 0.31       | 0.06       | 0.00       | 0.33                    | 1.47                     | 0.36%            | -0.15             | -0.19             | -2.06              | -6.75             | 0.10 |
|       | 60         | 0.00      | 0.91       | -0.08      | -0.45      | 0.00       | 0.00                    | -0.16                    | 0.00%            | -0.18             | -0.22             | -2.78              | -7.46             | 0.04 |

| Class | Sample no. | m K react | m Na react | m Mg react | m Ca react | m Cl react | m SO <sub>4</sub> react | m HCO <sub>3</sub> react | f <sub>sea</sub> | SI <sub>cal</sub> | SI <sub>dol</sub> | SI <sub>gyps</sub> | SI <sub>hal</sub> | SMI  |
|-------|------------|-----------|------------|------------|------------|------------|-------------------------|--------------------------|------------------|-------------------|-------------------|--------------------|-------------------|------|
| MGS   | 7          | -0.12     | 1.60       | 0.00       | 0.07       | 0.00       | 0.02                    | 1.20                     | 0.33%            | 0.16              | 0.3               | -2.33              | -6.6              | 0.11 |
|       | 11         | 0.02      | -1.68      | 0.50       | 0.25       | 0.00       | 0.79                    | -0.39                    | 0.72%            | -0.25             | -0.34             | -1.73              | -6.52             | 0.15 |
|       | 15         | -0.04     | -3.42      | 0.56       | 1.36       | 0.00       | 0.70                    | 0.65                     | 1.20%            | 0.61              | 1.18              | -1.51              | -6.24             | 0.21 |
|       | 24         | 0.17      | -0.07      | -0.12      | 0.38       | 0.00       | 0.04                    | 0.29                     | 0.40%            | 0.38              | 0.57              | -2.17              | -6.71             | 0.10 |
|       | 53         | 0.39      | -1.06      | 2.03       | 0.75       | 0.00       | 0.87                    | 2.11                     | 1.05%            | 1.48              | 3.31              | -1.66              | -6.14             | 0.22 |
| MGF   | 1          | -0.15     | -12.46     | 2.02       | 4.21       | 0.00       | 2.12                    | -0.33                    | 4.39%            | 0.12              | 0.29              | -0.94              | -5.29             | 0.66 |
|       | 6          | -0.13     | -0.37      | 0.19       | 1.76       | 0.00       | 1.38                    | 0.49                     | 1.71%            | 0.06              | 0.01              | -1.28              | -5.71             | 0.33 |
|       | 12         | -0.17     | -1.39      | 0.60       | 1.92       | 0.00       | 1.72                    | 2.05                     | 2.29%            | 0.46              | 0.91              | -1.21              | -5.52             | 0.43 |
|       | 19         | -0.14     | 0.37       | -0.03      | 1.09       | 0.00       | 1.27                    | 0.69                     | 1.38%            | 0.46              | 0.81              | -1.4               | -5.83             | 0.28 |
|       | 22         | -0.15     | -2.03      | 2.27       | 2.14       | 0.00       | 1.09                    | 3.37                     | 2.65%            | 0.33              | 0.85              | -1.32              | -5.42             | 0.48 |
|       | 25         | -0.18     | 3.02       | -0.55      | 0.61       | 0.00       | -0.04                   | 2.29                     | 0.76%            | 0.16              | -0.1              | -2.11              | -6.06             | 0.19 |
|       | 39         | 0.05      | 0.58       | -0.28      | 0.62       | 0.00       | -0.22                   | 1.19                     | 1.11%            | 0.37              | 0.6               | -2.22              | -5.96             | 0.22 |
|       | 51         | 0.13      | -3.59      | 0.73       | 0.56       | 0.00       | 0.71                    | -0.82                    | 1.15%            | -0.31             | -0.44             | -1.65              | -6.31             | 0.20 |
|       | 54         | 1.55      | 6.16       | 3.15       | 3.32       | 0.00       | 3.42                    | 10.65                    | 3.56%            | 1.98              | 4.16              | -1                 | -5.03             | 0.77 |
|       | 55         | 0.01      | 7.00       | -0.32      | 1.09       | 0.00       | 1.64                    | 3.96                     | 1.35%            | 0.36              | 0.51              | -1.37              | -5.6              | 0.36 |
|       | 58         | 0.34      | 1.97       | -0.27      | 0.32       | 0.00       | -0.19                   | 2.13                     | 0.76%            | 0.38              | 0.62              | -2.41              | -6.12             | 0.18 |

| Class | Sample no. | m K react | m Na react | m Mg react | m Ca react | m Cl react | m SO <sub>4</sub> react | m HCO <sub>3</sub> react | f <sub>sea</sub> | SI <sub>cal</sub> | SI <sub>dol</sub> | SI <sub>gyps</sub> | SI <sub>hal</sub> | SMI  |
|-------|------------|-----------|------------|------------|------------|------------|-------------------------|--------------------------|------------------|-------------------|-------------------|--------------------|-------------------|------|
| MGH   | 2          | -0.07     | 1.94       | -0.28      | -0.36      | 0.00       | 1.03                    | 0.00                     | 1.15%            | -0.19             | -0.12             | -1.91              | -5.87             | 0.26 |
|       | 3          | -0.12     | 0.42       | 0.02       | 2.24       | 0.00       | 2.85                    | 2.29                     | 2.67%            | 0.49              | 0.87              | -1.03              | -5.34             | 0.52 |
|       | 4          | -0.13     | -0.02      | -0.20      | 0.12       | 0.00       | 0.84                    | -0.97                    | 1.07%            | -0.17             | -0.29             | -1.72              | -6.03             | 0.22 |
|       | 17         | -0.14     | 4.34       | -0.10      | 0.00       | 0.00       | 1.50                    | 1.82                     | 1.29%            | 0.07              | 0.3               | -1.66              | -5.71             | 0.32 |
|       | 28         | -0.13     | -0.36      | 0.05       | 1.22       | 0.00       | 2.21                    | 0.19                     | 2.39%            | 0.09              | 0.21              | -1.22              | -5.45             | 0.46 |
|       | 29         | 0.05      | -4.28      | 0.32       | 2.19       | 0.00       | 2.30                    | -0.01                    | 4.15%            | 0.06              | 0.18              | -1.07              | -5.09             | 0.71 |
|       | 32         | -0.08     | 2.04       | -0.26      | -0.33      | 0.00       | 0.97                    | -0.98                    | 0.79%            | -0.57             | -0.96             | -1.92              | -6.1              | 0.20 |
|       | 50         | 0.01      | 0.50       | 1.08       | 0.34       | 0.00       | 1.33                    | -0.58                    | 1.85%            | -0.46             | -0.56             | -1.57              | -5.61             | 0.37 |
| MGE   | 5          | 0.71      | -13.83     | 3.44       | 8.95       | 0.00       | 10.77                   | 5.55                     | 16.75%           | 0.55              | 1.28              | -0.37              | -3.98             | 2.85 |
|       | 13         | -0.01     | 26.09      | -2.14      | -0.27      | 0.00       | 7.30                    | 4.60                     | 5.87%            | 0.09              | 0.49              | -1.29              | -4.48             | 1.41 |
|       | 16         | -0.61     | -2.70      | 1.37       | 5.37       | 0.00       | 7.09                    | 3.20                     | 9.98%            | 0.4               | 0.91              | -0.6               | -4.34             | 1.78 |
|       | 18         | -0.25     | 4.47       | -0.79      | 0.42       | 0.00       | 2.29                    | 2.29                     | 3.15%            | 0.26              | 0.63              | -1.37              | -5.12             | 0.64 |
|       | 26         | -0.03     | 8.79       | 0.35       | 2.50       | 0.00       | 4.24                    | 2.78                     | 4.11%            | 0.79              | 1.6               | -0.93              | -4.88             | 0.88 |
|       | 27         | 0.36      | 2.35       | 0.67       | 2.05       | 0.00       | 5.71                    | 0.24                     | 4.58%            | 0.39              | 0.93              | -0.88              | -4.89             | 0.91 |
|       | 30         | -0.18     | 10.42      | 0.11       | 3.85       | 0.00       | 6.10                    | 1.98                     | 5.02%            | 0.29              | 0.51              | -0.72              | -4.73             | 1.08 |
|       | 31         | -0.17     | 2.52       | -0.71      | -0.43      | 0.00       | 1.35                    | -0.72                    | 1.62%            | -0.5              | -0.78             | -1.85              | -5.61             | 0.35 |
|       | 44         | 0.14      | 2.39       | -1.48      | -0.74      | 0.00       | 0.79                    | -1.15                    | 2.27%            | -0.99             | -1.76             | -2.15              | -5.38             | 0.44 |
|       | 45         | 0.26      | -0.28      | -0.54      | -0.44      | 0.00       | 0.77                    | -1.40                    | 2.00%            | -1.12             | -1.87             | -1.95              | -5.56             | 0.37 |
|       | 46         | 0.53      | 6.40       | -1.27      | -0.11      | 0.00       | 2.95                    | -0.40                    | 3.40%            | -0.49             | -0.82             | -1.45              | -5.03             | 0.71 |
|       | 56         | -0.02     | 14.36      | 0.02       | 1.09       | 0.00       | 4.41                    | 4.75                     | 2.63%            | 1.15              | 2.36              | -1.13              | -5.08             | 0.70 |

| Class | Sample no. | m K react | m Na react | m Mg react | m Ca react | m Cl react | m SO <sub>4</sub> react | m HCO <sub>3</sub> react | f <sub>sea</sub> | SI <sub>cal</sub> | SI <sub>dol</sub> | SI <sub>gyss</sub> | SI <sub>hal</sub> | SMI  |
|-------|------------|-----------|------------|------------|------------|------------|-------------------------|--------------------------|------------------|-------------------|-------------------|--------------------|-------------------|------|
| S     | 33         | -0.78     | -57.63     | 9.15       | 25.11      | 0.00       | 11.45                   | 0.58                     | 48.16%           | 0.63              | 1.46              | -0.04              | -3.18             | 7.66 |
|       | 34         | -2.30     | -32.83     | 2.03       | 20.01      | 0.00       | 20.46                   | 0.27                     | 39.05%           | 0.47              | 1.07              | 0.02               | -3.31             | 6.48 |
|       | 35         | -2.60     | -32.74     | 12.79      | 25.64      | 0.00       | 36.69                   | 0.77                     | 34.94%           | 0.73              | 1.61              | 0.22               | -3.42             | 6.07 |
|       | 41         | -3.53     | -98.95     | 0.75       | 33.42      | 0.00       | -11.46                  | 0.75                     | 45.78%           | 0.41              | 0.79              | -0.87              | -3.33             | 6.41 |
|       | 42         | -1.45     | -1.26      | -0.04      | 9.40       | 0.00       | 15.93                   | -0.13                    | 22.39%           | 0.01              | 0.17              | -0.25              | -3.68             | 3.99 |
|       | 43         | -0.44     | -37.87     | 15.23      | 23.99      | 0.00       | 36.56                   | -1.12                    | 33.99%           | 0.09              | 0.38              | 0.19               | -3.46             | 5.87 |
|       | 47         | -1.01     | -1.55      | 3.69       | 15.44      | 0.00       | 23.26                   | -1.48                    | 25.68%           | 0                 | 0.11              | -0.03              | -3.58             | 4.65 |
|       | 48         | -1.57     | -9.14      | 5.98       | 16.65      | 0.00       | 30.08                   | -1.19                    | 29.98%           | -0.09             | 0                 | 0.05               | -3.48             | 5.39 |
|       | 49         | -1.51     | -17.57     | 7.07       | 24.19      | 0.00       | 26.31                   | -0.70                    | 24.20%           | 0.28              | 0.56              | 0.14               | -3.7              | 4.28 |



**Table S3.** Pearson correlation matrix of some variables of the groundwater samples from the study area.

|                           |                 | Total Depth    | Water level    | pH            | EC             | Distance       | BEX            | SAR            | Cl             | m K-react      | m Na-react     | m Mg-react    | m Ca-react    | m SO <sub>4</sub> -react | m HCO <sub>3</sub> -react | SI <sub>Hal</sub> | SI <sub>Cal</sub> | SI <sub>Dol</sub> | SI <sub>Gyps</sub> |
|---------------------------|-----------------|----------------|----------------|---------------|----------------|----------------|----------------|----------------|----------------|----------------|----------------|---------------|---------------|--------------------------|---------------------------|-------------------|-------------------|-------------------|--------------------|
| Total Depth               | PC <sup>1</sup> | 1              |                |               |                |                |                |                |                |                |                |               |               |                          |                           |                   |                   |                   |                    |
|                           | Sig. (2-tailed) |                |                |               |                |                |                |                |                |                |                |               |               |                          |                           |                   |                   |                   |                    |
| Water level               | PC              | <b>.565**</b>  | 1              |               |                |                |                |                |                |                |                |               |               |                          |                           |                   |                   |                   |                    |
|                           | Sig. (2-tailed) | 0.000          |                |               |                |                |                |                |                |                |                |               |               |                          |                           |                   |                   |                   |                    |
| pH                        | PC              | .259*          | 0.224          | 1             |                |                |                |                |                |                |                |               |               |                          |                           |                   |                   |                   |                    |
|                           | Sig. (2-tailed) | 0.045          | 0.085          |               |                |                |                |                |                |                |                |               |               |                          |                           |                   |                   |                   |                    |
| EC                        | PC              | -0.254         | <b>-.557**</b> | -.409**       | 1              |                |                |                |                |                |                |               |               |                          |                           |                   |                   |                   |                    |
|                           | Sig. (2-tailed) | 0.050          | <b>0.000</b>   | 0.001         |                |                |                |                |                |                |                |               |               |                          |                           |                   |                   |                   |                    |
| Distance                  | PC              | <b>.601**</b>  | <b>.855**</b>  | 0.209         | <b>-.574**</b> | 1              |                |                |                |                |                |               |               |                          |                           |                   |                   |                   |                    |
|                           | Sig. (2-tailed) | 0.000          | <b>0.000</b>   | 0.109         | 0.000          |                |                |                |                |                |                |               |               |                          |                           |                   |                   |                   |                    |
| BEX                       | PC              | 0.070          | <b>.315*</b>   | .347**        | -.485**        | 0.233          | 1              |                |                |                |                |               |               |                          |                           |                   |                   |                   |                    |
|                           | Sig. (2-tailed) | 0.594          | <b>0.014</b>   | 0.007         | 0.000          | 0.073          |                |                |                |                |                |               |               |                          |                           |                   |                   |                   |                    |
| SAR                       | PC              | -.413**        | <b>-.569**</b> | -.349**       | <b>.776**</b>  | <b>-.695**</b> | -0.180         | 1              |                |                |                |               |               |                          |                           |                   |                   |                   |                    |
|                           | Sig. (2-tailed) | 0.001          | 0.000          | 0.006         | 0.000          | 0.000          | 0.169          |                |                |                |                |               |               |                          |                           |                   |                   |                   |                    |
| Cl                        | PC              | -0.251         | <b>-.558**</b> | -.433**       | <b>.981**</b>  | <b>-.558**</b> | <b>-.626**</b> | <b>.746**</b>  | 1              |                |                |               |               |                          |                           |                   |                   |                   |                    |
|                           | Sig. (2-tailed) | 0.053          | 0.000          | 0.001         | 0.000          | 0.000          | 0.000          | 0.000          |                |                |                |               |               |                          |                           |                   |                   |                   |                    |
| m K-react                 | PC              | 0.210          | .385**         | .449**        | <b>-.744**</b> | .361**         | <b>.667**</b>  | <b>-.533**</b> | <b>-.784**</b> | 1              |                |               |               |                          |                           |                   |                   |                   |                    |
|                           | Sig. (2-tailed) | 0.107          | 0.002          | 0.000         | 0.000          | 0.005          | 0.000          | 0.000          | 0.000          |                |                |               |               |                          |                           |                   |                   |                   |                    |
| m Na-react                | PC              | 0.104          | .409**         | .380**        | <b>-.717**</b> | .341**         | <b>.927**</b>  | -.317*         | <b>-.813**</b> | <b>.715**</b>  | 1              |               |               |                          |                           |                   |                   |                   |                    |
|                           | Sig. (2-tailed) | 0.430          | 0.001          | 0.003         | 0.000          | 0.008          | 0.000          | 0.014          | 0.000          | 0.000          |                |               |               |                          |                           |                   |                   |                   |                    |
| m Mg-react                | PC              | -0.104         | -.347**        | -0.219        | <b>.779**</b>  | -.348**        | -0.195         | .392**         | <b>.711**</b>  | -.403**        | <b>-.547**</b> | 1             |               |                          |                           |                   |                   |                   |                    |
|                           | Sig. (2-tailed) | 0.427          | 0.007          | 0.093         | 0.000          | 0.006          | 0.136          | 0.002          | 0.000          | 0.001          | 0.000          |               |               |                          |                           |                   |                   |                   |                    |
| m Ca-react                | PC              | -0.192         | <b>-.512**</b> | -.419**       | <b>.960**</b>  | <b>-.511**</b> | <b>-.648**</b> | <b>.645**</b>  | <b>.967**</b>  | <b>-.804**</b> | <b>-.846**</b> | <b>.763**</b> | 1             |                          |                           |                   |                   |                   |                    |
|                           | Sig. (2-tailed) | 0.142          | 0.000          | 0.001         | 0.000          | 0.000          | 0.000          | 0.000          | 0.000          | 0.000          | 0.000          | 0.000         |               |                          |                           |                   |                   |                   |                    |
| m SO <sub>4</sub> -react  | PC              | -0.237         | -.384**        | -.288*        | <b>.794**</b>  | -.437**        | 0.079          | <b>.646**</b>  | <b>.677**</b>  | -.462**        | -0.246         | <b>.817**</b> | <b>.672**</b> | 1                        |                           |                   |                   |                   |                    |
|                           | Sig. (2-tailed) | 0.068          | 0.002          | 0.026         | 0.000          | 0.000          | 0.550          | 0.000          | 0.000          | 0.000          | 0.058          | 0.000         | 0.000         |                          |                           |                   |                   |                   |                    |
| m HCO <sub>3</sub> -react | PC              | .264*          | 0.001          | .329*         | -0.109         | -0.016         | 0.218          | 0.040          | -0.141         | .319*          | 0.204          | -0.069        | -0.126        | -0.150                   | 1                         |                   |                   |                   |                    |
|                           | Sig. (2-tailed) | 0.041          | 0.992          | 0.010         | 0.405          | 0.903          | 0.094          | 0.759          | 0.282          | 0.013          | 0.117          | 0.602         | 0.337         | 0.252                    |                           |                   |                   |                   |                    |
| SI <sub>Hal</sub>         | PC              | <b>-.507**</b> | <b>-.710**</b> | -.406**       | <b>.837**</b>  | <b>-.822**</b> | -.306*         | <b>.887**</b>  | <b>.810**</b>  | <b>-.572**</b> | -.483**        | <b>.554**</b> | <b>.763**</b> | <b>.675**</b>            | 0.061                     | 1                 |                   |                   |                    |
|                           | Sig. (2-tailed) | 0.000          | 0.000          | 0.001         | 0.000          | 0.000          | 0.017          | 0.000          | 0.000          | 0.000          | 0.000          | 0.000         | 0.000         | 0.000                    | 0.644                     |                   |                   |                   |                    |
| SI <sub>Cal</sub>         | PC              | 0.203          | -0.187         | <b>.586**</b> | 0.179          | -0.129         | -0.007         | 0.050          | 0.149          | 0.000          | -0.100         | 0.238         | 0.199         | 0.094                    | <b>.692**</b>             | 0.168             | 1                 |                   |                    |
|                           | Sig. (2-tailed) | 0.119          | 0.153          | 0.000         | 0.171          | 0.327          | 0.957          | 0.702          | 0.256          | 0.998          | 0.447          | 0.067         | 0.128         | 0.477                    | 0.000                     | 0.198             |                   |                   |                    |
| SI <sub>Dol</sub>         | PC              | 0.155          | -0.222         | <b>.587**</b> | 0.220          | -0.191         | 0.001          | 0.111          | 0.187          | 0.001          | -0.110         | .279*         | 0.223         | 0.137                    | <b>.694**</b>             | 0.230             | <b>.988**</b>     | 1                 |                    |
|                           | Sig. (2-tailed) | 0.235          | 0.088          | 0.000         | 0.091          | 0.144          | 0.994          | 0.400          | 0.152          | 0.996          | 0.402          | 0.031         | 0.087         | 0.296                    | 0.000                     | 0.077             | 0.000             |                   |                    |
| SI <sub>Gyps</sub>        | PC              | -.460**        | <b>-.665**</b> | -.384**       | <b>.831**</b>  | <b>-.734**</b> | -0.203         | <b>.757**</b>  | <b>.774**</b>  | <b>-.524**</b> | -.435**        | <b>.664**</b> | <b>.760**</b> | <b>.768**</b>            | 0.069                     | <b>.919**</b>     | .270*             | .320*             | 1                  |
|                           | Sig. (2-tailed) | 0.000          | 0.000          | 0.002         | 0.000          | 0.000          | 0.119          | 0.000          | 0.000          | 0.000          | 0.001          | 0.000         | 0.000         | 0.000                    | 0.600                     | 0.000             | 0.037             | 0.013             |                    |

**\*\*Correlation is significant at the 0.01 level (2-tailed); \*Correlation is significant at the 0.05 level (2-tailed); <sup>1</sup>PC is Pearson Correlation.**

**Table S4.** Percentages and facies of the hydrochemical substages of freshening and intrusion stages.

| Stage                                  | Substage   | Description                 | Anion facies | Ion percentage                       | No. of samples in each substage | % of samples in each substage | Value | Range in heatmap | Color                                                                               |
|----------------------------------------|------------|-----------------------------|--------------|--------------------------------------|---------------------------------|-------------------------------|-------|------------------|-------------------------------------------------------------------------------------|
| Freshening                             | Freshwater | Distal- Proximal- Endmember | -HCO3        | %HCO <sub>3</sub> >50%,<br>%Ca>66.6% | 2                               | 3.4                           | 1     | ≤2.5             |  |
|                                        | f4         |                             | -HCO3        | %HCO3>50%                            | 6                               | 10.2                          | 2     |                  |                                                                                     |
|                                        | f3         |                             | -MixHCO3     | 50%≥%HCO <sub>3</sub> >33.3%         | 2                               | 3.4                           | 3     | 2.6-3.5          |                                                                                     |
|                                        | f2         |                             | -MixCl       | 33.3%<%Cl≤50%                        | 5                               | 8.5                           | 4     | 3.6-4.5          |                                                                                     |
|                                        | f1         |                             | -Cl          | 50%<%Cl<66.6%                        | 9                               | 13.6                          | 5     | 4.6-5.4          |                                                                                     |
| Freshwater- saltwater dynamic boundary |            |                             |              |                                      |                                 |                               |       | 5.5              | .....                                                                               |
| Intrusion                              | i1         | Endmember- Proximal- Distal | -MixHCO3     | 50%≥%HCO <sub>3</sub> >33.3%         | 1                               | 1.7                           | 6     | 5.6-6.5          |  |
|                                        | i2         |                             | -MixCl       | 33.3%<%Cl≤50%                        | 5                               | 8.5                           | 7     | 6.6-7.5          |                                                                                     |
|                                        | i3         |                             | -Cl          | 50%<%Cl<66.6%                        | 13                              | 23.7                          | 8     | 7.6-8.5          |                                                                                     |
|                                        | i4         |                             | -Cl          | %Cl>66.6%                            | 1                               | 1.7                           | 9     |                  |                                                                                     |
|                                        | Saltwater  |                             | -Cl          | %Cl>66.6%,<br>%Na>50%                | 15                              | 25.4                          | 10    | >8.5             |                                                                                     |

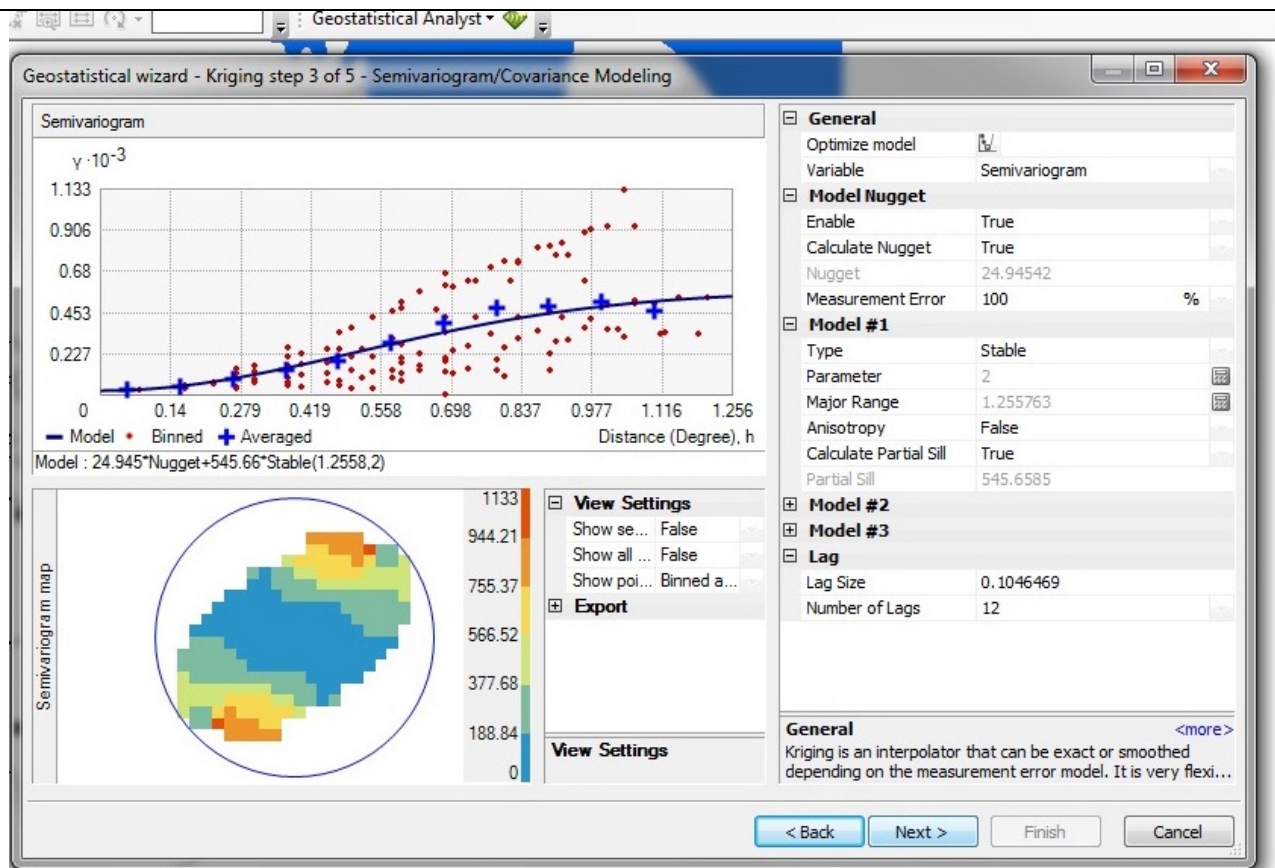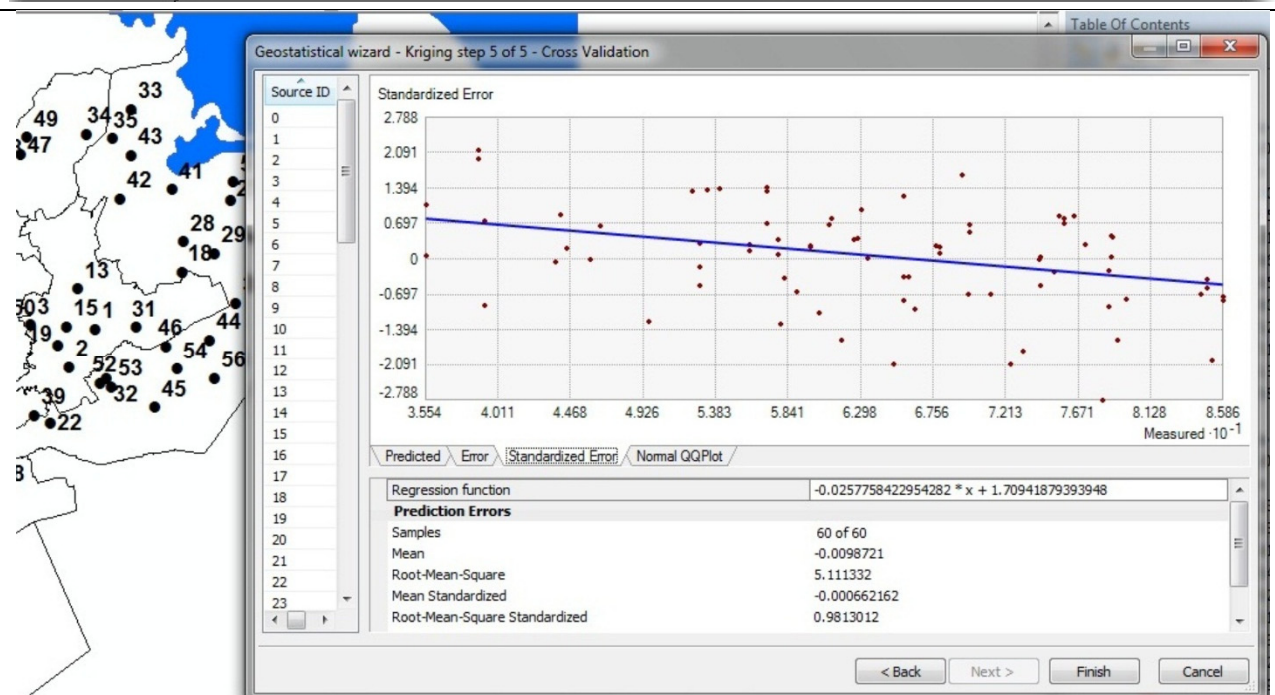

Figure S1. An example for Semivariogram and Cross validation of the used kriging interpolation method .

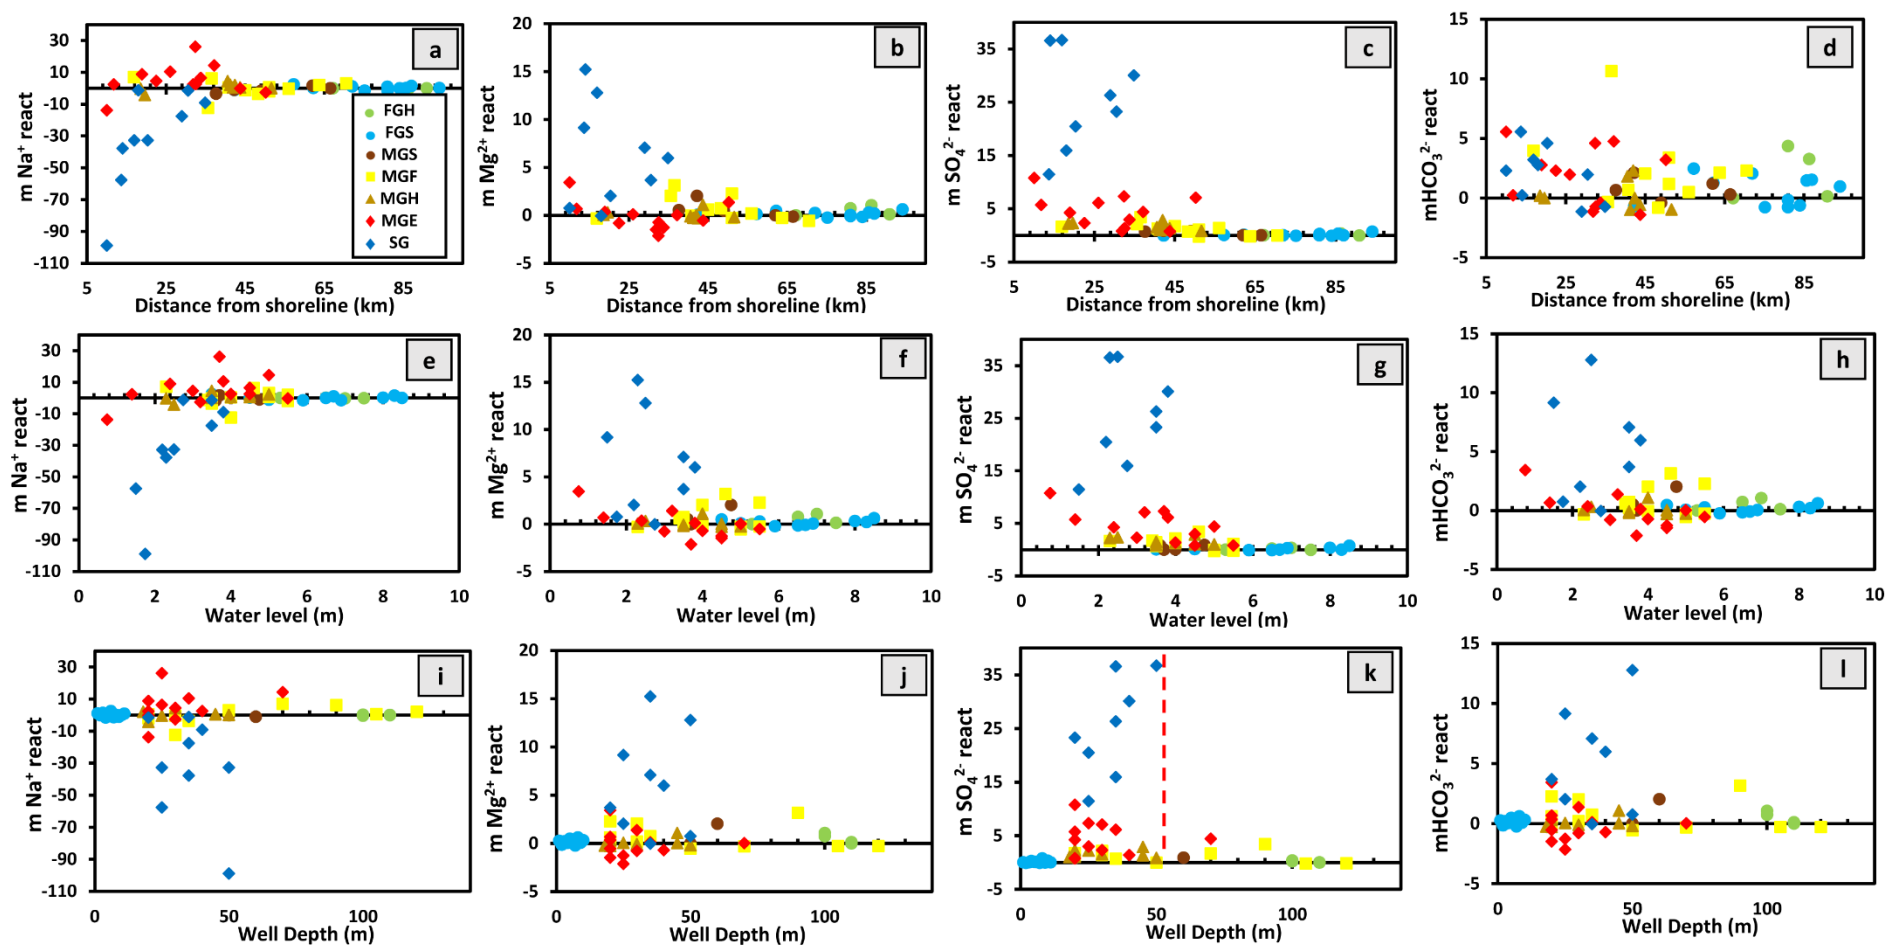

Figure S2. Relationship of ionic deviations of selected major ions with distance from the shoreline, water level, and well depth.

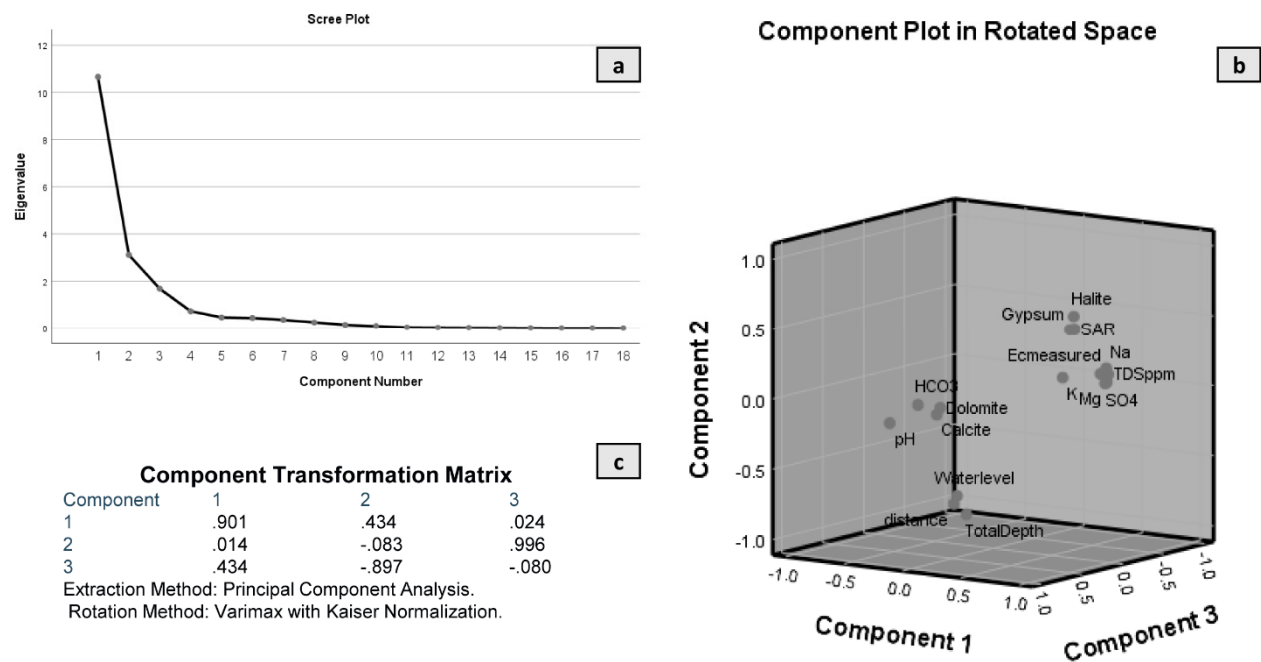

**Figure S3.** a) Scree plot, b) PCA, and c) component transformation matrix of the applied factor analysis for the studied variables.
